# Supplementary material for: Aromaticity and tautomerism of a 4n π electron dihydrohexaazapentacene
Source: Royal Society of Chemistry journal article supplement (doi:10.1039/c9qo01285k), 2019-12-06
Supplement: c9qo01285k1.pdf [file c9qo01285k1.pdf]

## Supporting Information

### Aromaticity and Tautomerism of a $4n \pi$ Electrons

#### Dihydrohexaazapentacene

Chun-Lin Sun<sup>1</sup>, Xiao-E Luo<sup>1</sup>, Huan Xu<sup>1</sup>, Qi-Wei Song<sup>1</sup>, Zhi-Ping Fan<sup>1</sup>, Xiao-Zhen Wang<sup>1</sup>, Jing-Jing Cao<sup>1</sup>, Zi-Fa Shi<sup>1</sup>, Hao-Li Zhang\*<sup>1,2</sup>

<sup>1</sup> College of Chemistry and Chemical Engineering, Lanzhou University, State Key Laboratory of Applied Organic Chemistry (SKLAOC); Key Laboratory of Special Function Materials and Structure Design (MOE), Lanzhou, 730000, P. R. China,

<sup>2</sup> Tianjin Key Laboratory of Molecular Optoelectronic Sciences, and Collaborative Innovation Center of Chemical Science and Engineering (Tianjin), Tianjin, 300072, P. R. China

\* Corresponding Author: Prof. Hao-Li Zhang

E-mail: [haoli.zhang@lzu.edu.cn](mailto:haoli.zhang@lzu.edu.cn)

## **Table of contents**

- 1. Molecule synthesis and characterization**
- 2. The time-resolved fluorescence spectra**
- 3. Nucleus independent chemical shift (NICS) calculation**
- 4. Thermochemistry simulation**
- 5. The femtosecond transient absorption (fs TA) kinetics decay curve fitting for  
DHHAP**
- 6. References**

## 1. Molecule synthesis and characterization

**Synthesis:** Pyridine-2,3-diamine and 2,5-dihydroxy-1,4-benzoquinone were mixed by sufficient grinding, then heated for 1 hour at 180 °C under an inert atmosphere. After cooling down, the mixture was filtrated and the residue was washed by water and acetone for several times. Finally, a dark purple metallic solid was obtained (35%).<sup>1</sup> dihydro-1,5,7,8,12,14-hexaazapentacene (**DHHAP**) is slightly soluble in strong polar solvents, such as DMF and DMSO.

**General Instrument:** <sup>1</sup>H NMR and <sup>1</sup>H-<sup>1</sup>H COSY NMR were recorded on a Bruker ADVANCE 400MHz and 600MHz spectrometer. UV-Vis absorption spectra were measured using a T6 UV-Vis spectrometer.

The obtained **DHHAP** was fully characterized by <sup>1</sup>H NMR spectra:

**b-DHHAP:** <sup>1</sup>H NMR (CDCl<sub>3</sub>, 400 MHz): δ 6.50 (d, 1H, *J* = 7.2 Hz), 6.62 (s, 2H), 6.77 (d, 1H, *J* = 7.2 Hz), 7.26 (d, 1H, *J* = 5.2 Hz), 7.46 (d, 1H, *J* = 4.0Hz), 8.10 (d, 1H, *J* = 8.0 Hz), 8.78 (s, 1H), 10.44 (s, 1H), 10.49 (s, 1H).

**q-DHHAP:** <sup>1</sup>H NMR (CDCl<sub>3</sub>, 400 MHz): δ 6.45 (s, 2H), 6.64 (d, 2H, *J* = 7.6Hz), 6.82 (d, 2H, *J* = 7.2 Hz), 7.50 (d, 2H, *J* = 3.6 Hz), 10.03 (s, 1H), 10.09 (s, 1H).

The **elemental analysis** found: C: 63.19, H: 3.91, N: 27.64. Calculated for C<sub>16</sub>H<sub>10</sub>N<sub>6</sub>·H<sub>2</sub>O: C: 63.15, H: 3.97, N: 27.62

**ESI-HRMS:** C<sub>16</sub>H<sub>10</sub>N<sub>6</sub> [M+H]<sup>+</sup> Calculated: 287.0995, Found: 287.1041.

Oxidization of **DHHAP** to 1,5,7,8,12,14-hexaazapentacene (**HAP**) was carried out with CuOAc and pyridine with yield of about 30%.<sup>2</sup> Compound HAP is a dark powder and almost insoluble in any solvents, so the exact structure couldn't be further confirmed. The elemental analysis found: C: 67.72, H: 2.81, N: 29.47. Calculated for C<sub>16</sub>H<sub>8</sub>N<sub>6</sub>: C: 67.6, H: 2.84, N: 29.56.

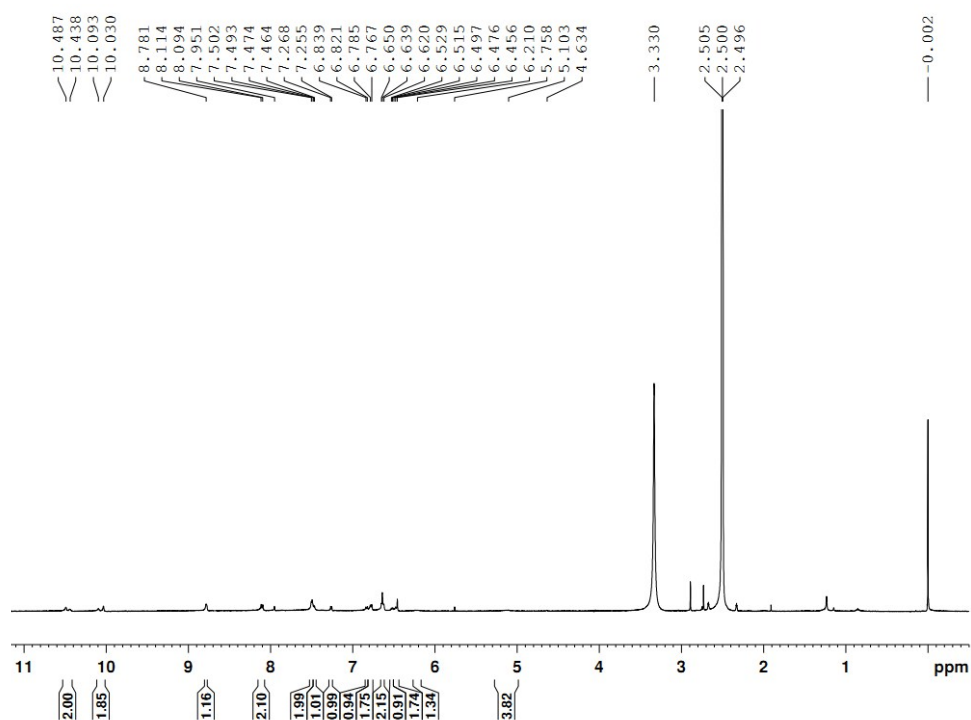

**Figure S1** <sup>1</sup>H NMR full spectra of **DHHAP** in DMSO-*d*<sub>6</sub> (400MHz)

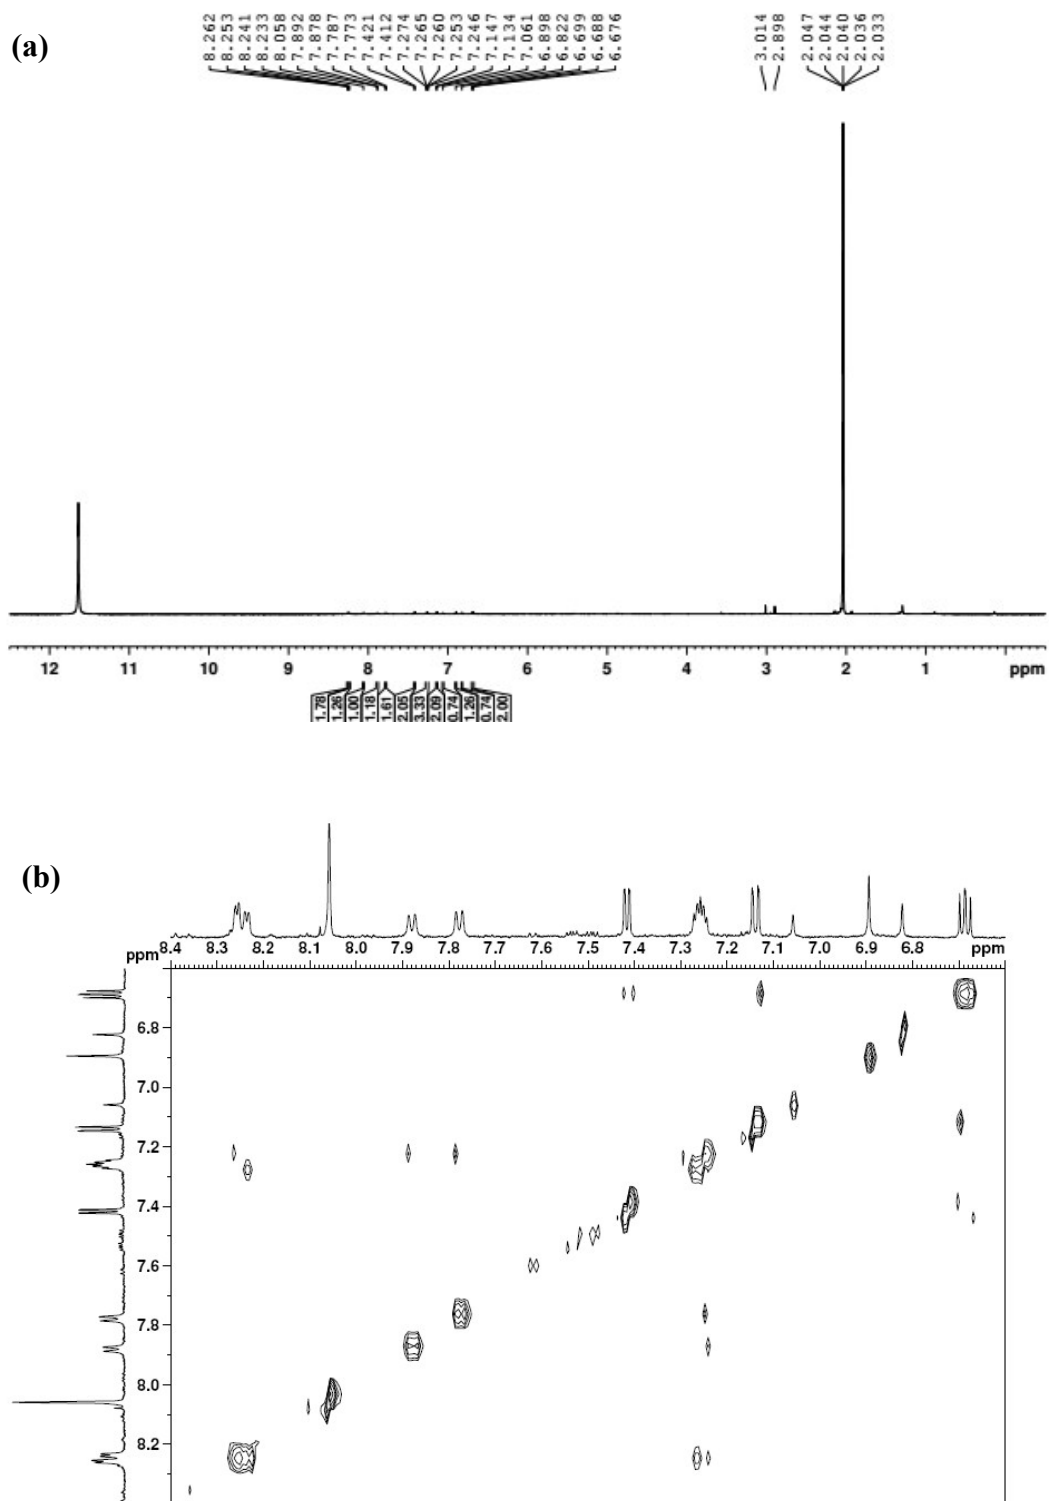

**Figure S2** (a)  $^1\text{H}$  NMR full spectrum and (b)  $^1\text{H}$ - $^1\text{H}$  COSY spectra of **DHHAP** in  $\text{CD}_3\text{COOD}$  (600MHz)

## 2. The time-resolved fluorescence spectra

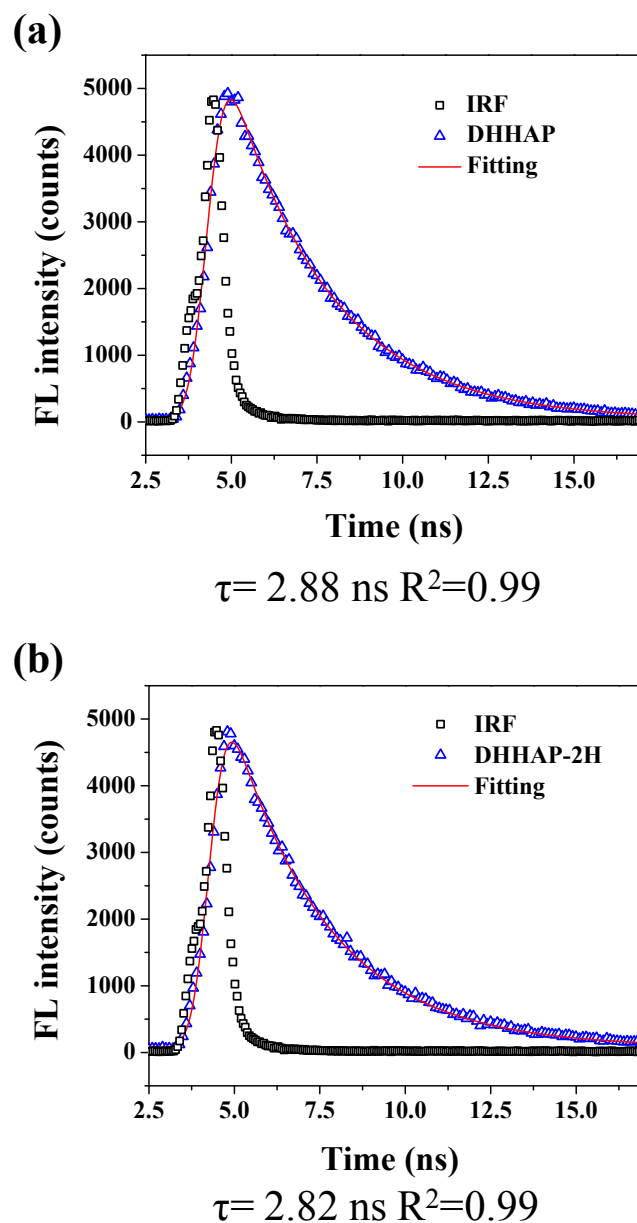

**Figure. S3.** The time-resolved fluorescence spectra of **DHHAP** (a) in DMF solutions, (b) added excess HCl acid. The scatter dot presents the experiment fluorescence decay curves, and the black curves show the fitting line. The life of fluorescence ( $\tau$ ) and coefficient of determination ( $R^2$ ) are provided with each chart.

### 3. Nucleus independent chemical shift (NICS) calculation

All geometries were optimized at the DFT/B3LYP/6-311++G(d,p) level and NICS were computed for the Gauge-Independent Atomic Orbital (GIAO) method at some level as implemented in Gaussian09.<sup>3,4</sup>

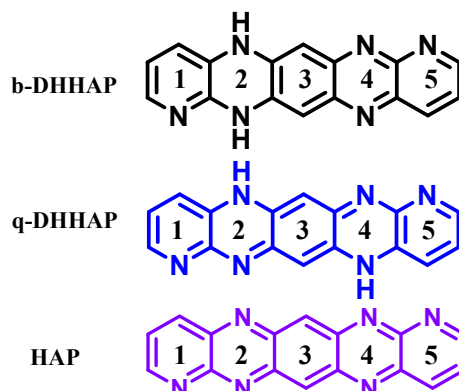

**Table S1.** Calculated NICS values (in ppm) of different rings in **DHHAP** and **HAP** (purple). NICS values correspond to the rings from left to right as drawn in the structures, The black and red number show diatropic (aromatic) and paratropic (antiaromatic) NICS, respectively.

| Molecule       | NICS(X)   | R-1     | R-2      | R-3      | R-4      | R-5     | Total    |
|----------------|-----------|---------|----------|----------|----------|---------|----------|
| <b>b-DHHAP</b> | NICS(0.0) | -3.9333 | 7.9235   | -4.3269  | -4.7500  | -5.5221 | -10.6088 |
|                | NICS(0.5) | -5.4306 | 7.0558   | -5.6967  | -7.6992  | -7.8802 | -19.6509 |
|                | NICS(1.0) | -5.8589 | 5.1949   | -5.7638  | -9.0177  | -8.8646 | -24.3101 |
|                | NICS(1.5) | -4.2693 | 3.2530   | -3.8751  | -6.9544  | -6.8578 | -18.7036 |
|                | NICS(2.0) | -2.6460 | 1.7465   | -2.3054  | -4.7811  | -4.6675 | -12.6535 |
|                | NICS(2.5) | -1.5801 | 0.8056   | -1.4878  | -3.3087  | -3.1543 | -8.7253  |
|                | NICS(3.0) | -0.9626 | 0.2942   | -1.0771  | -2.3621  | -2.1955 | -6.3031  |
| <b>q-DHHAP</b> | NICS(0.0) | -4.8147 | 4.6957   | -0.9282  | 4.6985   | -4.8417 | -1.1904  |
|                | NICS(0.5) | -6.7091 | 2.5406   | -2.8487  | 2.4898   | -6.7566 | -11.284  |
|                | NICS(1.0) | -7.3066 | 0.3063   | -3.5769  | 0.2486   | -7.3348 | -17.6634 |
|                | NICS(1.5) | -5.4096 | -0.3170  | -2.0946  | -0.3451  | -5.4154 | -13.5817 |
|                | NICS(2.0) | -3.4887 | -0.4857  | -0.9453  | -0.4974  | -3.4900 | -8.9071  |
|                | NICS(2.5) | -2.2289 | -0.5424  | -0.5159  | -0.5476  | -2.2296 | -6.0644  |
|                | NICS(3.0) | -1.4694 | -0.5303  | -0.3874  | -0.5326  | -1.4697 | -4.3894  |
| <b>HAP</b>     | NICS(0.0) | -3.4953 | -8.2410  | -11.9472 | -8.2307  | -3.5967 | -35.5109 |
|                | NICS(0.5) | -6.0773 | -11.2027 | -13.8522 | -11.2170 | -6.2379 | -48.5871 |
|                | NICS(1.0) | -7.6068 | -11.9134 | -13.4911 | -11.9281 | -7.6980 | -52.6374 |
|                | NICS(1.5) | -6.1465 | -8.9693  | -9.8709  | -8.9647  | -6.1446 | -40.096  |
|                | NICS(2.0) | -4.3362 | -6.1899  | -6.6268  | -6.1771  | -4.3035 | -27.6335 |
|                | NICS(2.5) | -3.0374 | -4.3605  | -4.6088  | -4.3487  | -3.0035 | -19.3589 |
|                | NICS(3.0) | -2.1868 | -3.1875  | -3.3860  | -3.1788  | -2.1592 | -14.0983 |

#### 4. Thermochemistry simulation

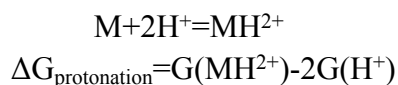

**Table S2.** The free energies of different structures of **HAP**, **DHHAP** and possible diprotonated **DHHAP** derivatives after Zero-Point Energy (ZPE) corrections (DFT/B3LYP/6-311++G(d,p), at 298.150 Kelvin and 1.00 Atm), and the  $G(H^+)$  is about 6.3 kcal/mol.<sup>5</sup>

| Compound       | Free Energy (kcal/mol) | Protonation energy | Compound       | Energy (kcal/mol) | protonation energy |
|----------------|------------------------|--------------------|----------------|-------------------|--------------------|
| <b>TAP</b>     | -571642.09507          | --                 | <b>HAP</b>     | -591786.17698     | --                 |
| <b>b-DHHAP</b> | -592546.37209          | --                 | <b>q-DHHAP</b> | -592557.05670     | --                 |
| <b>a-2-1</b>   | -592954.86855          | -421.09646         | <b>b-2-1</b>   | -592962.59446     | -418.13775         |
| <b>a-2-2</b>   | -592962.59446          | -428.82236         | <b>b-2-2</b>   | -592948.08391     | -403.62721         |
| <b>a-2-3</b>   | -592965.22686          | -431.45477         | <b>b-2-3</b>   | -592970.08128     | -425.62457         |
| <b>a-2-4</b>   | -592957.24681          | -423.47472         | <b>b-2-4</b>   | -592954.86855     | -410.41185         |
| <b>a-2-5</b>   | -592951.20954          | -417.43745         | <b>a-2-6</b>   | -592948.08391     | -414.31182         |

#### 5. The femtosecond transient absorption (fs TA) kinetics decay curve fitting for DHHAP

**Table S3.** The kinetics decay curve fitting data at representative wavelength of **DHHAP** solution and the solution added with hydrochloric acid

| $\lambda$ | <b>DHHAP</b> |            | $\lambda$ | <b>DHHAP treated with acid</b> |            |
|-----------|--------------|------------|-----------|--------------------------------|------------|
|           | $\tau_1$     | $\tau_2$   |           | $\tau_1$                       | $\tau_2$   |
| 503       | 2681(120)    | 230(55)    | 518       | 699(616)                       | 1.755(180) |
| 536       | 2800(37.7)   | 1.6(-133)  | 587       | 0.034(-906)                    | 692(-2.3)  |
| 577       | 1.0(-405)    | 0.2(285)   | 641       | 1091(-28.9)                    | 700(-106)  |
| 604       | 19.4(16)     | 4104(-262) |           |                                |            |
| 654       | 19.4(211)    | 2378(-341) |           |                                |            |

The  $\lambda$  present the representative wavelength (nm),  $\tau_1$  and  $\tau_2$  present two fitting lifetime (ps) by the bi-exponential fitting model and the pre-exponential factor number (a.u.) shown in parentheses.

#### 6. References

1. Q. Tang, J. Liu, H. S. Chan and Q. Miao, *Chemistry*, 2009, **15**, 3965-3969.
2. S. Z. Weng, P. Shukla, M. Y. Kuo, Y. C. Chang, H. S. Sheu, I. Chao and Y. T. Tao, *ACS Appl Mater Interfaces*, 2009, **1**, 2071-2079.
3. Z. Chen, C. S. Wannere, C. Corminboeuf, R. Puchta and P. Schleyer, *Chem. Rev.*, 2005, **105**, 3842-3888.
4. R. A. Gaussian 09, M. J. Frisch, G. W. Trucks, H. B. Schlegel, G. E. Scuseria, M. A. Robb, J. R. Cheeseman, G. Scalmani, V. Barone, B. Mennucci, G. A. Petersson, H. Nakatsuji, M. Caricato, X. Li, H. P. Hratchian, A. F. Izmaylov, J. Bloino, G. Zheng, J. L. Sonnenberg, M. Hada, M. Ehara, K. Toyota, R. Fukuda, J. Hasegawa, M. Ishida, T. Nakajima, Y. Honda, O. Kitao, H. Nakai, T.

Vreven, J. A. Montgomery, Jr., J. E. Peralta, F. Ogliaro, M. Bearpark, J. J. Heyd, E. Brothers, K. N. Kudin, V. N. Staroverov, R. Kobayashi, J. Normand, K. Raghavachari, A. Rendell, J. C. Burant, S. S. Iyengar, J. Tomasi, M. Cossi, N. Rega, J. M. Millam, M. Klene, J. E. Knox, J. B. Cross, V. Bakken, C. Adamo, J. Jaramillo, R. Gomperts, R. E. Stratmann, O. Yazyev, A. J. Austin, R. Cammi, C. Pomelli, J. W. Ochterski, R. L. Martin, K. Morokuma, V. G. Zakrzewski, G. A. Voth, P. Salvador, J. J. Dannenberg, S. Dapprich, A. D. Daniels, Ö. Farkas, J. B. Foresman, J. V. Ortiz, J. Cioslowski, and D. J. Fox, Gaussian, Inc., Wallingford CT, 2009.

5. Y. Fu, L. Liu, R.-Q. Li, R. Liu and Q.-X. Guo, *J. Am. Chem. Soc.*, 2004, **126**, 814-822.
